# Supplementary material for: Assessment of the Mutation Profile of Tonsillar Squamous Cell Carcinomas Using Targeted Next-Generation Sequencing
Source: MDPI journal article supplement (doi:10.3390/biomedicines11030851), 2023-03-10
Supplement: s1 [file s1]

Supplementary Table S1. Full list of pathogenic mutations

| Hugo_Symbol | Chromosome | Position  | Ref  | Alt | Variant_Classification | HGVSp_Short  | Coverage | Alt count | Frequency | Sample Name       | HPV |
|-------------|------------|-----------|------|-----|------------------------|--------------|----------|-----------|-----------|-------------------|-----|
| PIK3CA      | chr3       | 178936091 | G    | A   | Missense_Mutation      | p.E545K      | 1997     | 143       | 7.2       | 225_26_s606_8256  | pos |
| TP53        | chr17      | 7578235   | T    | C   | Missense_Mutation      | p.Y205C      | 1999     | 157       | 7.9       | 225_26_s606_8256  | pos |
| NOTCH1      | chr9       | 139399362 | C    | T   | Missense_Mutation      | p.R1594Q     | 349      | 23        | 6.6       | 274_29_S715_10256 | pos |
| TP53        | chr17      | 7579442   | G    | -   | Frame_Shift_Del        | p.P82Rfs*41  | 590      | 211       | 35.8      | 274_29_S715_10256 | pos |
| RB1         | chr13      | 48942685  | C    | T   | Nonsense_Mutation      | p.R358*      | 187      | 14        | 7.5       | 257_31_s610_6032  | pos |
| IDH1        | chr2       | 209113112 | C    | T   | Missense_Mutation      | p.R132H      | 1797     | 154       | 8.6       | 227_9_S606_6278   | pos |
| CDKN2A      | chr9       | 21971155  | G    | A   | Missense_Mutation      | p.A68V       | 919      | 109       | 11.9      | 227_9_S606_6278   | pos |
| TP53        | chr17      | 7578458   | G    | A   | Missense_Mutation      | p.R158C      | 907      | 74        | 8.2       | 227_9_S606_6278   | pos |
| STK11       | chr19      | 1220487   | G    | A   | Missense_Mutation      | p.D194N      | 1505     | 78        | 5.2       | 227_9_S606_6278   | pos |
| SMARCB1     | chr22      | 24133967  | C    | T   | Nonsense_Mutation      | p.R40*       | 506      | 77        | 15.2      | 227_9_S606_6278   | pos |
| PIK3CA      | chr3       | 178936091 | G    | A   | Missense_Mutation      | p.E545K      | 1998     | 158       | 7.9       | 210_18_02_4428    | pos |
| PIK3CA      | chr3       | 178936082 | G    | A   | Missense_Mutation      | p.E542K      | 950      | 196       | 20.6      | 207_21_01_6107    | pos |
| ERBB2       | chr17      | 37881332  | G    | A   | Missense_Mutation      | p.V842I      | 400      | 39        | 9.8       | 207_21_01_6107    | pos |
| SMAD4       | chr18      | 48591918  | C    | T   | Missense_Mutation      | p.R361C      | 107      | 18        | 16.8      | 207_21_01_6107    | pos |
| PDGFRA      | chr4       | 55152108  | C    | T   | Missense_Mutation      | p.S847L      | 181      | 151       | 83.4      | 236_22_S607_3808  | neg |
| FGFR2       | chr10      | 123279677 | G    | A   | Missense_Mutation      | p.S252L      | 1197     | 169       | 14.1      | 236_22_S607_3808  | neg |
| FLT3        | chr13      | 28592624  | T    | C   | Missense_Mutation      | p.N841D      | 981      | 73        | 7.4       | 236_22_S607_3808  | neg |
| TP53        | chr17      | 7578458   | G    | A   | Missense_Mutation      | p.R158C      | 1056     | 415       | 39.3      | 236_22_S607_3808  | neg |
| AKT1        | chr14      | 105246482 | C    | T   | Missense_Mutation      | p.E40K       | 812      | 100       | 12.3      | 214_24_03_5248    | neg |
| TP53        | chr17      | 7578212   | G    | -   | Frame_Shift_Del        | p.R213Dfs*34 | 1057     | 144       | 13.6      | 214_24_03_5248    | neg |
| TP53        | chr17      | 7578212   | G    | A   | Nonsense_Mutation      | p.R213*      | 1226     | 317       | 25.9      | 214_24_03_5248    | neg |
| SMAD4       | chr18      | 48575152  | C    | T   | Nonsense_Mutation      | p.Q116*      | 2000     | 180       | 9         | 214_24_03_5248    | neg |
| PTEN        | chr10      | 89720799  | TACT | -   | Frame_Shift_Del        | p.T319*      | 1395     | 327       | 23.4      | 217_25_04_6322    | pos |
| PDGFRA      | chr4       | 55152108  | C    | T   | Missense_Mutation      | p.S847L      | 1081     | 78        | 7.2       | 226_27_s606_7629  | pos |

|         |       |           |                        |   |                   |              |      |      |      |                  |     |
|---------|-------|-----------|------------------------|---|-------------------|--------------|------|------|------|------------------|-----|
| EGFR    | chr7  | 55241726  | C                      | T | Missense_Mutation | p.T725M      | 2000 | 108  | 5.4  | 226_27_s606_7629 | pos |
| TP53    | chr17 | 7577090   | C                      | T | Missense_Mutation | p.R283H      | 353  | 18   | 5.1  | 226_27_s606_7629 | pos |
| TP53    | chr17 | 7578211   | C                      | T | Missense_Mutation | p.R213Q      | 1566 | 114  | 7.3  | 226_27_s606_7629 | pos |
| TP53    | chr17 | 7578235   | T                      | C | Missense_Mutation | p.Y205C      | 1567 | 89   | 5.7  | 226_27_s606_7629 | pos |
| TP53    | chr17 | 7578464   | G                      | A | Missense_Mutation | p.R156C      | 1997 | 100  | 5    | 226_27_s606_7629 | pos |
| SMAD4   | chr18 | 48593507  | C                      | T | Missense_Mutation | p.R420C      | 210  | 22   | 10.5 | 226_27_s606_7629 | pos |
| SMAD4   | chr18 | 48604665  | G                      | A | Missense_Mutation | p.R496H      | 1054 | 69   | 6.5  | 226_27_s606_7629 | pos |
| SMAD4   | chr18 | 48604668  | G                      | A | Missense_Mutation | p.R497H      | 1054 | 69   | 6.5  | 226_27_s606_7629 | pos |
| VHL     | chr3  | 10188200  | C                      | T | Missense_Mutation | p.H115Y      | 83   | 21   | 25.3 | 243_29_S608_8707 | pos |
| FGFR3   | chr4  | 1803565   | G                      | A | Missense_Mutation | p.R248H      | 1999 | 174  | 8.7  | 243_29_S608_8707 | pos |
| PTEN    | chr10 | 89624232  | AGCCATCATCAAAGAGATCGTT | - | Frame_Shift_Del   | p.I4Efs*13   | 2855 | 838  | 29.4 | 222_30_05_8684   | pos |
| TP53    | chr17 | 7578470   | CGGG                   | - | Frame_Shift_Del   | p.P153Afs*16 | 1974 | 1182 | 59.9 | 223_31_05_6348   | pos |
| PTEN    | chr10 | 89692905  | G                      | A | Missense_Mutation | p.R130Q      | 299  | 18   | 6    | 272_4_S708_9684  | pos |
| PTEN    | chr10 | 89692911  | G                      | A | Missense_Mutation | p.G132D      | 309  | 18   | 5.8  | 272_4_S708_9684  | pos |
| ALK     | chr2  | 29432664  | C                      | T | Missense_Mutation | p.R1275Q     | 267  | 150  | 56.2 | 231_17_S607_9963 | neg |
| PIK3CA  | chr3  | 178936091 | G                      | A | Missense_Mutation | p.E545K      | 1196 | 264  | 22.1 | 231_17_S607_9963 | neg |
| PIK3CA  | chr3  | 178952141 | G                      | A | Missense_Mutation | p.A1066T     | 153  | 13   | 8.5  | 231_17_S607_9963 | neg |
| NOTCH1  | chr9  | 139399351 | G                      | A | Missense_Mutation | p.R1598C     | 488  | 121  | 24.8 | 231_17_S607_9963 | neg |
| PTEN    | chr10 | 89624288  | T                      | C | Missense_Mutation | p.F21S       | 601  | 35   | 5.8  | 231_17_S607_9963 | neg |
| TP53    | chr17 | 7578544   | G                      | A | Missense_Mutation | p.A129V      | 2000 | 217  | 10.8 | 231_17_S607_9963 | neg |
| SMARCB1 | chr22 | 24143240  | C                      | T | Nonsense_Mutation | p.R158*      | 295  | 84   | 28.5 | 231_17_S607_9963 | neg |
| RET     | chr10 | 43615578  | G                      | A | Missense_Mutation | p.R886Q      | 196  | 15   | 7.7  | 249_19_S609_5250 | pos |
| TP53    | chr17 | 7577138   | C                      | T | Missense_Mutation | p.R267Q      | 204  | 13   | 6.4  | 249_19_S609_5250 | pos |
| PTEN    | chr10 | 89711899  | C                      | T | Missense_Mutation | p.R173C      | 233  | 12   | 5.2  | 250_20_S609_5496 | pos |
| TP53    | chr17 | 7577547   | C                      | T | Missense_Mutation | p.G245D      | 1980 | 582  | 29.4 | 250_20_S609_5496 | pos |
| EGFR    | chr7  | 55242511  | G                      | A | Missense_Mutation | p.D761N      | 485  | 76   | 15.7 | 213_21_03_8350   | pos |
| PTEN    | chr10 | 89711900  | G                      | A | Missense_Mutation | p.R173H      | 186  | 16   | 8.6  | 213_21_03_8350   | pos |

|        |       |           |   |   |                   |         |      |      |      |                   |     |
|--------|-------|-----------|---|---|-------------------|---------|------|------|------|-------------------|-----|
| RB1    | chr13 | 49033844  | C | T | Missense_Mutation | p.R661W | 209  | 11   | 5.3  | 213_21_03_8350    | pos |
| IDH2   | chr15 | 90631935  | G | A | Missense_Mutation | p.R140W | 310  | 40   | 12.9 | 213_21_03_8350    | pos |
| TP53   | chr17 | 7578461   | C | T | Missense_Mutation | p.V157I | 1886 | 98   | 5.2  | 213_21_03_8350    | pos |
| TP53   | chr17 | 7578469   | C | A | Missense_Mutation | p.G154V | 1781 | 1350 | 75.8 | 213_21_03_8350    | pos |
| SMAD4  | chr18 | 48575159  | C | T | Missense_Mutation | p.A118V | 753  | 39   | 5.2  | 213_21_03_8350    | pos |
| FBXW7  | chr4  | 153247288 | C | T | Missense_Mutation | p.R505H | 2000 | 230  | 11.5 | 253_22_S609_11232 | pos |
| FGFR2  | chr10 | 123279677 | G | A | Missense_Mutation | p.S252L | 1205 | 95   | 7.9  | 253_22_S609_11232 | pos |
| KRAS   | chr12 | 25398284  | C | T | Missense_Mutation | p.G12D  | 707  | 335  | 47.4 | 253_22_S609_11232 | pos |
| TP53   | chr17 | 7577570   | C | T | Missense_Mutation | p.M237I | 1997 | 119  | 6    | 253_22_S609_11232 | pos |
| TP53   | chr17 | 7578217   | G | A | Missense_Mutation | p.T211I | 819  | 41   | 5    | 253_22_S609_11232 | pos |
| TP53   | chr17 | 7578289   | C | A | Missense_Mutation | p.G187V | 815  | 97   | 11.9 | 253_22_S609_11232 | pos |
| TP53   | chr17 | 7579359   | G | A | Missense_Mutation | p.R110C | 210  | 112  | 53.3 | 253_22_S609_11232 | pos |
| ERBB2  | chr17 | 37881010  | C | T | Missense_Mutation | p.P780L | 1587 | 94   | 5.9  | 253_22_S609_11232 | pos |
| PIK3CA | chr3  | 178936091 | G | A | Missense_Mutation | p.E545K | 1995 | 103  | 5.2  | 216_24_04_8528    | neg |
| TP53   | chr17 | 7578235   | T | C | Missense_Mutation | p.Y205C | 1467 | 109  | 7.4  | 216_24_04_8528    | neg |
| PIK3CA | chr3  | 178936091 | G | A | Missense_Mutation | p.E545K | 1993 | 260  | 13   | 244_30_S608_9308  | pos |
| PDGFRA | chr4  | 55152071  | T | C | Missense_Mutation | p.C835R | 978  | 49   | 5    | 246_32_S609_2328  | pos |
| EGFR   | chr7  | 55233037  | C | T | Missense_Mutation | p.P596L | 1939 | 245  | 12.6 | 246_32_S609_2328  | pos |
| TP53   | chr17 | 7578422   | T | C | Missense_Mutation | p.T170A | 140  | 32   | 22.9 | 246_32_S609_2328  | pos |
| FBXW7  | chr4  | 153249385 | G | A | Missense_Mutation | p.R465C | 112  | 14   | 12.5 | 264_1_S09_9525    | pos |
| KIT    | chr4  | 55599332  | G | T | Missense_Mutation | p.D820Y | 488  | 33   | 6.8  | 268_2_S08_2402    | pos |
| CDH1   | chr16 | 68835629  | C | T | Nonsense_Mutation | p.R74*  | 1158 | 80   | 6.9  | 268_2_S08_2402    | pos |
| PIK3CA | chr3  | 178928079 | G | A | Missense_Mutation | p.E453K | 107  | 16   | 15   | 271_3_S06_2164    | pos |
| PTEN   | chr10 | 89624254  | A | G | Missense_Mutation | p.S10G  | 408  | 33   | 8.1  | 271_3_S06_2164    | pos |
| RB1    | chr13 | 49027168  | C | T | Nonsense_Mutation | p.R579* | 76   | 10   | 13.2 | 271_3_S06_2164    | pos |
| TP53   | chr17 | 7578457   | C | T | Missense_Mutation | p.R158H | 224  | 80   | 35.7 | 271_3_S06_2164    | pos |
| PIK3CA | chr3  | 178916936 | G | A | Missense_Mutation | p.R108H | 407  | 41   | 10.1 | 228_10_S606_5581  | neg |

|         |       |           |       |   |                   |              |      |     |      |                   |     |
|---------|-------|-----------|-------|---|-------------------|--------------|------|-----|------|-------------------|-----|
| PIK3CA  | chr3  | 178921548 | G     | A | Missense_Mutation | p.V344M      | 1554 | 101 | 6.5  | 228_10_S606_5581  | neg |
| KIT     | chr4  | 55594197  | C     | T | Missense_Mutation | p.R634W      | 527  | 60  | 11.4 | 228_10_S606_5581  | neg |
| FBXW7   | chr4  | 153259007 | G     | A | Nonsense_Mutation | p.Q270*      | 447  | 26  | 5.8  | 228_10_S606_5581  | neg |
| EGFR    | chr7  | 55249071  | C     | T | Missense_Mutation | p.T790M      | 709  | 38  | 5.4  | 228_10_S606_5581  | neg |
| CDKN2A  | chr9  | 21971063  | G     | A | Missense_Mutation | p.R99W       | 1264 | 84  | 6.6  | 228_10_S606_5581  | neg |
| ATM     | chr11 | 108236229 | G     | A | Nonsense_Mutation | p.W3055*     | 1369 | 90  | 6.6  | 228_10_S606_5581  | neg |
| TP53    | chr17 | 7579455   | C     | - | Frame_Shift_Del   | p.A78Qfs*45  | 633  | 132 | 20.9 | 228_10_S606_5581  | neg |
| SMAD4   | chr18 | 48591918  | C     | T | Missense_Mutation | p.R361C      | 751  | 136 | 18.1 | 228_10_S606_5581  | neg |
| FBXW7   | chr4  | 153250883 | G     | A | Nonsense_Mutation | p.R393*      | 1766 | 121 | 6.9  | 230_12_S607_10592 | pos |
| KRAS    | chr12 | 25378561  | G     | C | Missense_Mutation | p.A146G      | 234  | 26  | 11.1 | 230_12_S607_10592 | pos |
| RB1     | chr13 | 48955538  | C     | T | Nonsense_Mutation | p.R552*      | 784  | 152 | 19.4 | 230_12_S607_10592 | pos |
| TP53    | chr17 | 7577103   | C     | - | Frame_Shift_Del   | p.R280Efs*65 | 188  | 13  | 6.9  | 230_12_S607_10592 | pos |
| TP53    | chr17 | 7577102   | C     | A | Missense_Mutation | p.G279V      | 213  | 23  | 10.8 | 230_12_S607_10592 | pos |
| TP53    | chr17 | 7578449   | C     | - | Frame_Shift_Del   | p.A161Pfs*9  | 1437 | 194 | 13.5 | 230_12_S607_10592 | pos |
| HRAS    | chr11 | 533874    | T     | C | Missense_Mutation | p.Q61R       | 685  | 219 | 32   | 209_17_02_3803    | pos |
| SMAD4   | chr18 | 48593507  | C     | T | Missense_Mutation | p.R420C      | 219  | 13  | 5.9  | 209_17_02_3803    | pos |
| PIK3CA  | chr3  | 178936082 | G     | A | Missense_Mutation | p.E542K      | 1997 | 630 | 31.5 | 232_18_S607_9225  | pos |
| TP53    | chr17 | 7577539   | G     | A | Missense_Mutation | p.R248W      | 256  | 30  | 11.7 | 232_18_S607_9225  | pos |
| EGFR    | chr7  | 55249017  | C     | T | Missense_Mutation | p.P772L      | 236  | 14  | 5.9  | 212_20_03_6924    | pos |
| MET     | chr7  | 116417445 | C     | T | Missense_Mutation | p.H1106Y     | 473  | 24  | 5.1  | 212_20_03_6924    | pos |
| HRAS    | chr11 | 533874    | T     | C | Missense_Mutation | p.Q61R       | 569  | 49  | 8.6  | 212_20_03_6924    | pos |
| SMARCB1 | chr22 | 24176338  | C     | T | Missense_Mutation | p.R377C      | 435  | 33  | 7.6  | 212_20_03_6924    | pos |
| PDGFRA  | chr4  | 55152062  | G     | T | Missense_Mutation | p.V832L      | 445  | 37  | 8.3  | 239_25_S608_4692  | neg |
| FBXW7   | chr4  | 153249384 | C     | T | Missense_Mutation | p.R465H      | 473  | 200 | 42.3 | 239_25_S608_4692  | neg |
| EGFR    | chr7  | 55241678  | A     | G | Missense_Mutation | p.E709G      | 2000 | 105 | 5.2  | 239_25_S608_4692  | neg |
| EGFR    | chr7  | 55249028  | C     | T | Missense_Mutation | p.R776C      | 807  | 68  | 8.4  | 239_25_S608_4692  | neg |
| CDKN2A  | chr9  | 21971197  | ATCAT | - | Frame_Shift_Del   | p.M53Gfs*65  | 1937 | 426 | 22   | 239_25_S608_4692  | neg |

|         |       |           |   |   |                   |          |      |     |      |                  |     |
|---------|-------|-----------|---|---|-------------------|----------|------|-----|------|------------------|-----|
| TP53    | chr17 | 7578421   | G | A | Missense_Mutation | p.T170M  | 1008 | 230 | 22.8 | 239_25_S608_4692 | neg |
| MPL     | chr1  | 43815021  | C | T | Missense_Mutation | p.A519V  | 1628 | 99  | 6.1  | 241_27_S607_4120 | pos |
| RB1     | chr13 | 49033845  | G | A | Missense_Mutation | p.R661Q  | 595  | 69  | 11.6 | 241_27_S607_4120 | pos |
| TP53    | chr17 | 7579359   | G | A | Missense_Mutation | p.R110C  | 612  | 121 | 19.8 | 241_27_S607_4120 | pos |
| SMARCB1 | chr22 | 24176339  | G | A | Missense_Mutation | p.R377H  | 355  | 67  | 18.9 | 241_27_S607_4120 | pos |
| PIK3CA  | chr3  | 178936091 | G | A | Missense_Mutation | p.E545K  | 1998 | 130 | 6.5  | 242_28_S607_3732 | pos |
| EGFR    | chr7  | 55249007  | G | A | Missense_Mutation | p.V769M  | 768  | 63  | 8.2  | 242_28_S607_3732 | pos |
| EGFR    | chr7  | 55259545  | A | G | Missense_Mutation | p.E868G  | 887  | 48  | 5.4  | 242_28_S607_3732 | pos |
| PTEN    | chr10 | 89720871  | T | C | Missense_Mutation | p.F341S  | 255  | 23  | 9    | 242_28_S607_3732 | pos |
| HRAS    | chr11 | 534286    | C | T | Missense_Mutation | p.G13S   | 1010 | 80  | 7.9  | 242_28_S607_3732 | pos |
| ATM     | chr11 | 108172385 | C | T | Nonsense_Mutation | p.R1730* | 874  | 274 | 31.4 | 242_28_S607_3732 | pos |
| CDH1    | chr16 | 68835629  | C | T | Nonsense_Mutation | p.R74*   | 2000 | 151 | 7.5  | 242_28_S607_3732 | pos |
| PIK3CA  | chr3  | 178936082 | G | A | Missense_Mutation | p.E542K  | 1997 | 578 | 28.9 | 245_31_S609_503  | pos |
| ALK     | chr2  | 29443643  | G | A | Missense_Mutation | p.R1192W | 312  | 27  | 8.7  | 224_32_05_2023   | pos |
| KIT     | chr4  | 55594198  | G | A | Missense_Mutation | p.R634Q  | 92   | 14  | 15.2 | 224_32_05_2023   | pos |

---
